# Supplementary material for: DAPLE orchestrates apical actomyosin assembly from junctional polarity complexes
Source: PubMed Central journal article supplement — J Cell Biol. 2022 Apr 7;221(5):e202111002. doi: 10.1083/jcb.202111002 (PMC8996326; doi:10.1083/jcb.202111002), 2022-04-07

# Source data FIGURE 5

### Figure 5 - Panel B

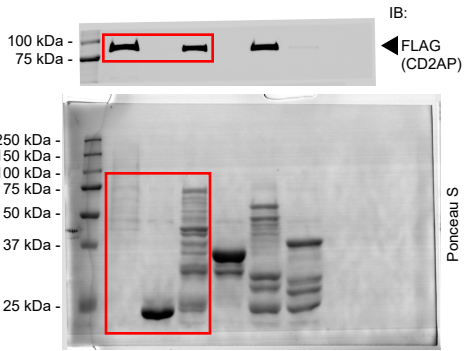

### Figure 5 - Panel C

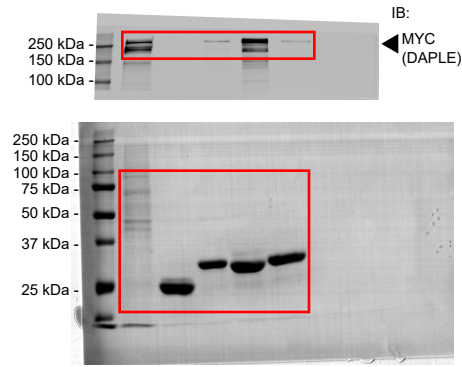

### Figure 5 - Panel D

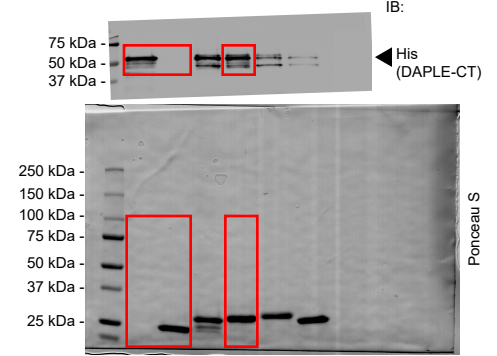

### Figure 5 - Panel E (left)

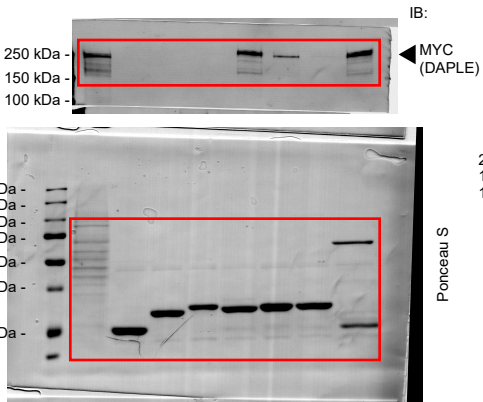

### Figure 5 - Panel E (center)

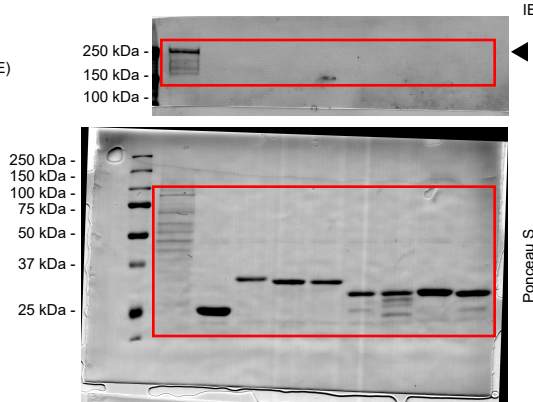

### Figure 5 - Panel E (right)

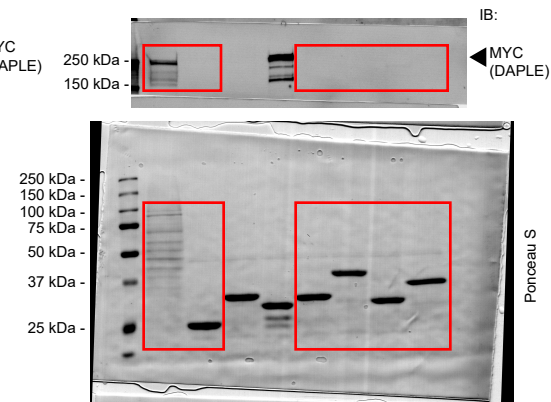

### Figure 5 - Panel F

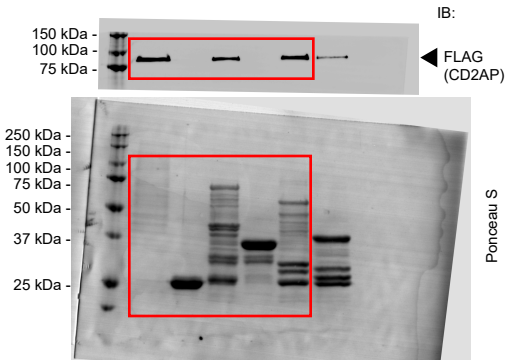

### Figure 5 - Panel H

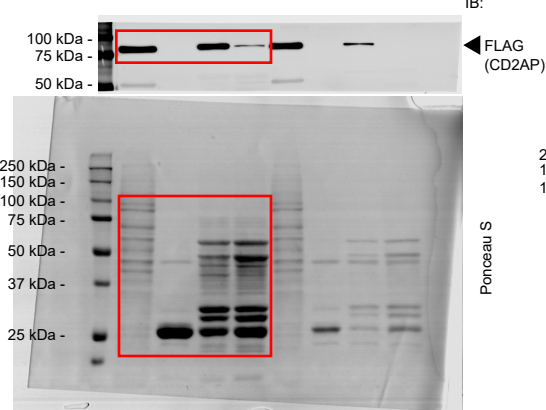

### Figure 5 - Panel I

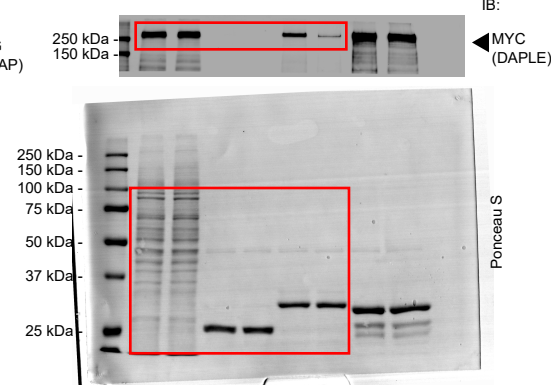

Supplement: JCB_202111002_SourceDataF5.pdf [file JCB_202111002_SourceDataF5.pdf]
