# Supplementary material for: DAPLE orchestrates apical actomyosin assembly from junctional polarity complexes
Source: PubMed Central journal article supplement — J Cell Biol. 2022 Apr 7;221(5):e202111002. doi: 10.1083/jcb.202111002 (PMC8996326; doi:10.1083/jcb.202111002), 2022-04-07

# Source data FIGURE S5

## Figure S5 - Panel A

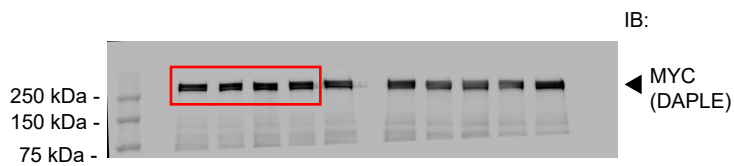

## Figure S5 - Panel B

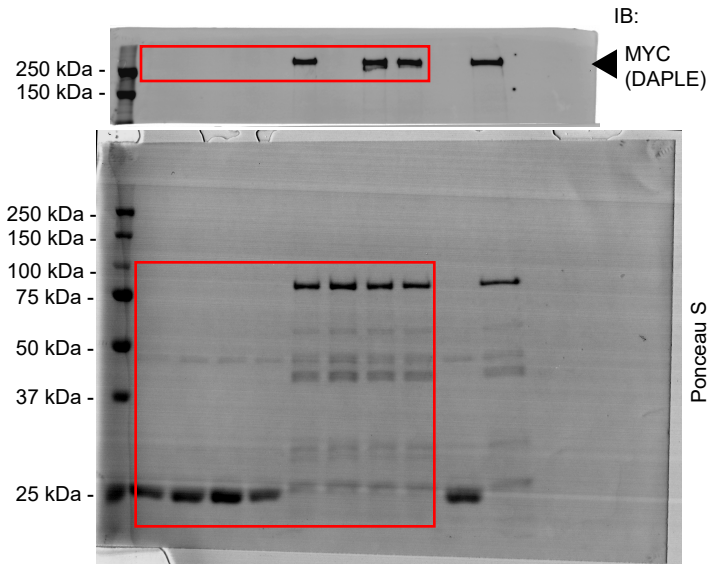

## Figure S5 - Panel C

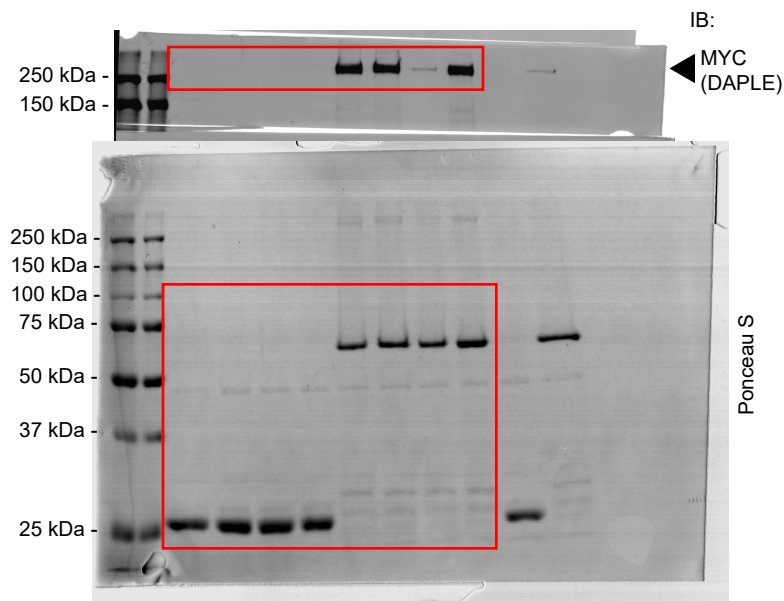

## Figure S5 - Panel D

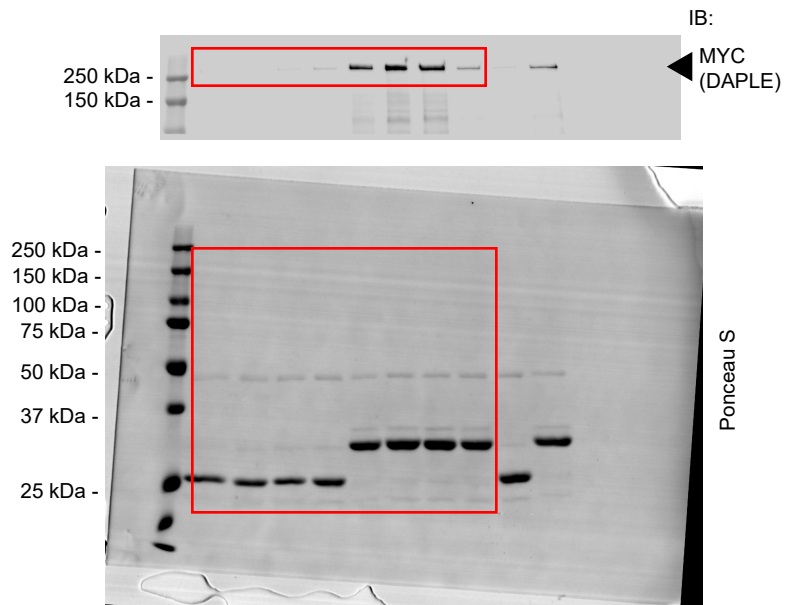

## Figure S5 - Panel G

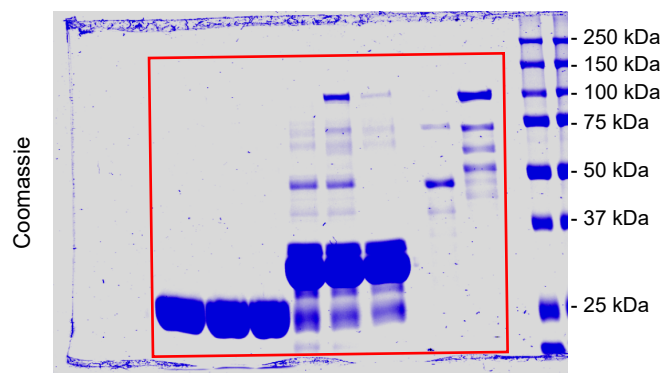

Supplement: JCB_202111002_SourceDataFS5.pdf [file JCB_202111002_SourceDataFS5.pdf]
