# Supplementary figures and images for: DAPLE orchestrates apical actomyosin assembly from junctional polarity complexes
Source: PubMed Central journal article supplement — J Cell Biol. 2022 Apr 7;221(5):e202111002. doi: 10.1083/jcb.202111002 (PMC8996326; doi:10.1083/jcb.202111002), 2022-04-07

# Source data FIGURE 1

**Figure 1 - Panel A**

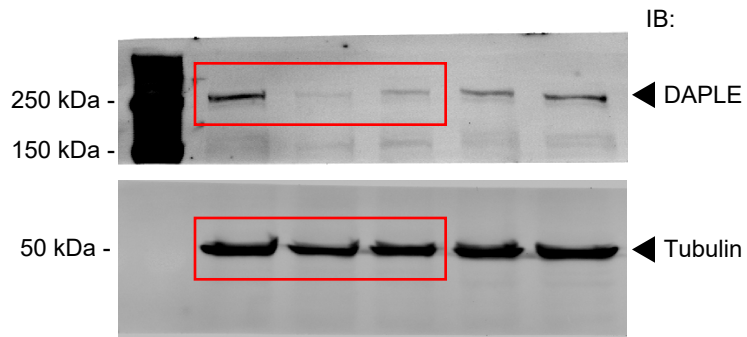

Supplement: JCB_202111002_SourceDataF1.pdf [file JCB_202111002_SourceDataF1.pdf]

# Source data FIGURE 2

## Figure 2 - Panel A

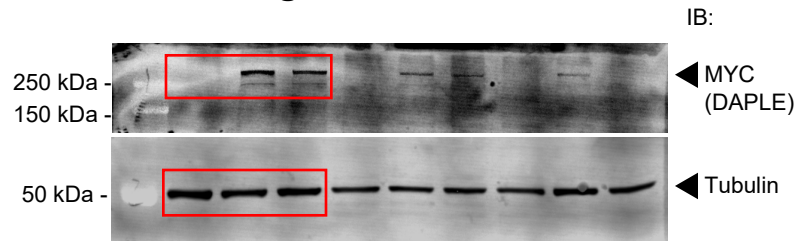

## Figure 2 - Panel E (IP MYC)

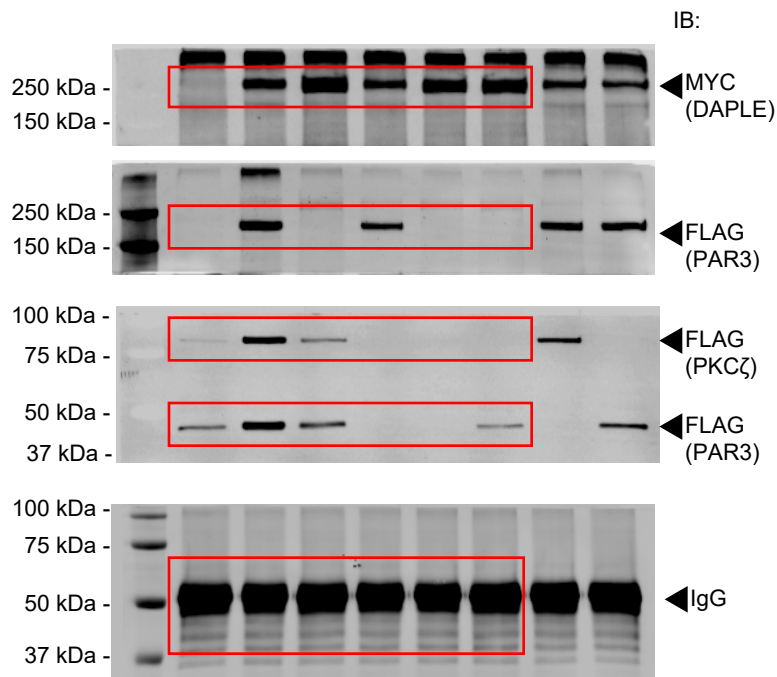

## Figure 2 - Panel E (LYSATES)

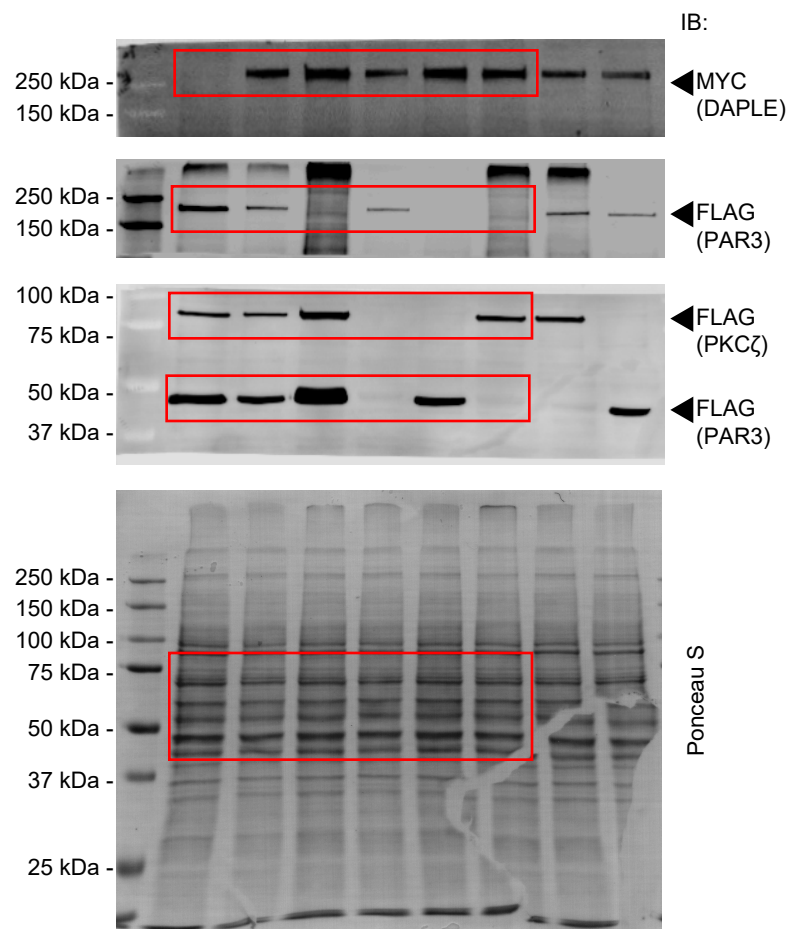

Supplement: JCB_202111002_SourceDataF2.pdf [file JCB_202111002_SourceDataF2.pdf]

# Source data FIGURE 4

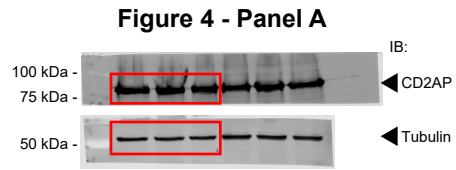

Supplement: JCB_202111002_SourceDataF4.pdf [file JCB_202111002_SourceDataF4.pdf]

# Source data FIGURE 6

**Figure 6 - Panel B**

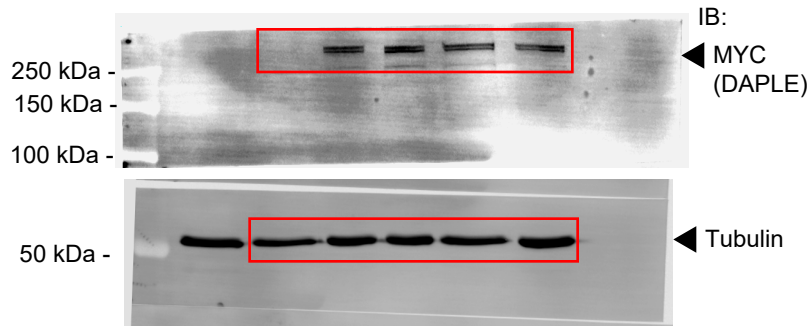

Supplement: JCB_202111002_SourceDataF6.pdf [file JCB_202111002_SourceDataF6.pdf]

# Source data FIGURE 8

## Figure 8 - Panel A (top)

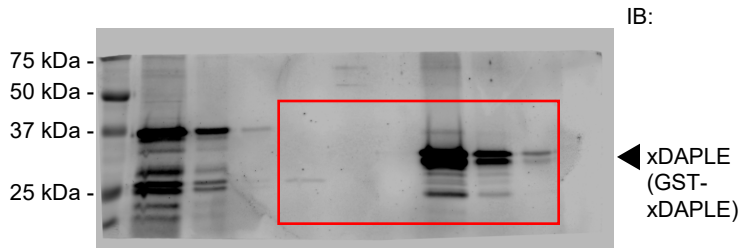

## Figure 8 - Panel A (bottom)

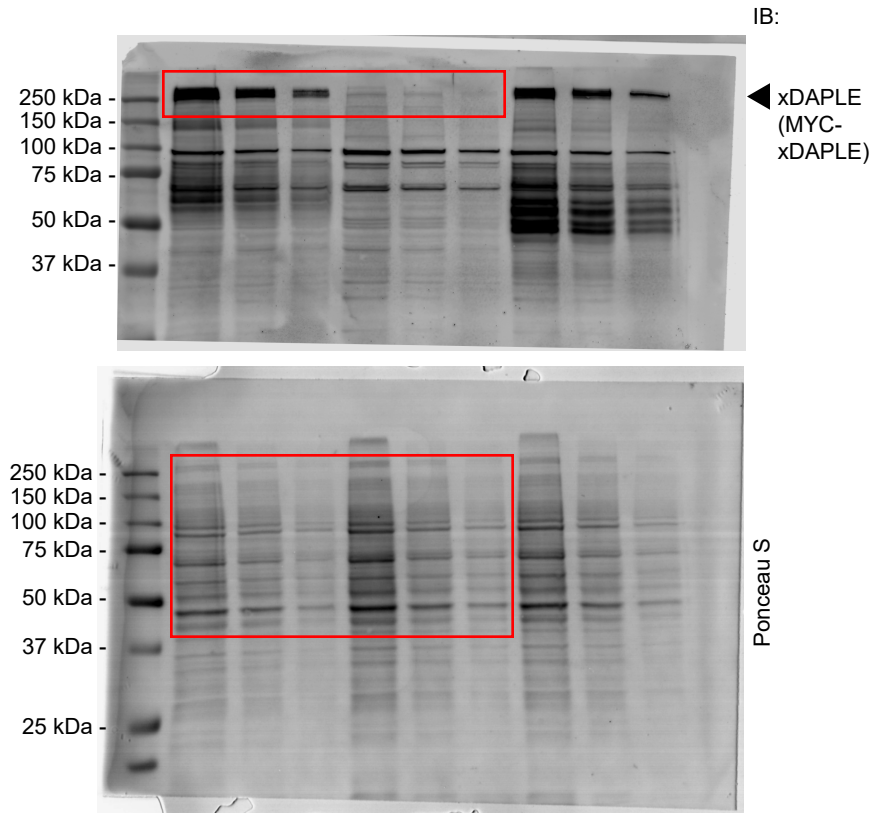

Supplement: JCB_202111002_SourceDataF8.pdf [file JCB_202111002_SourceDataF8.pdf]

# Source data FIGURE S1

## Figure S1 - Panel B

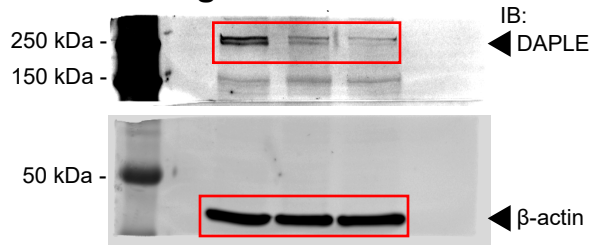

## Figure S1 - Panel F

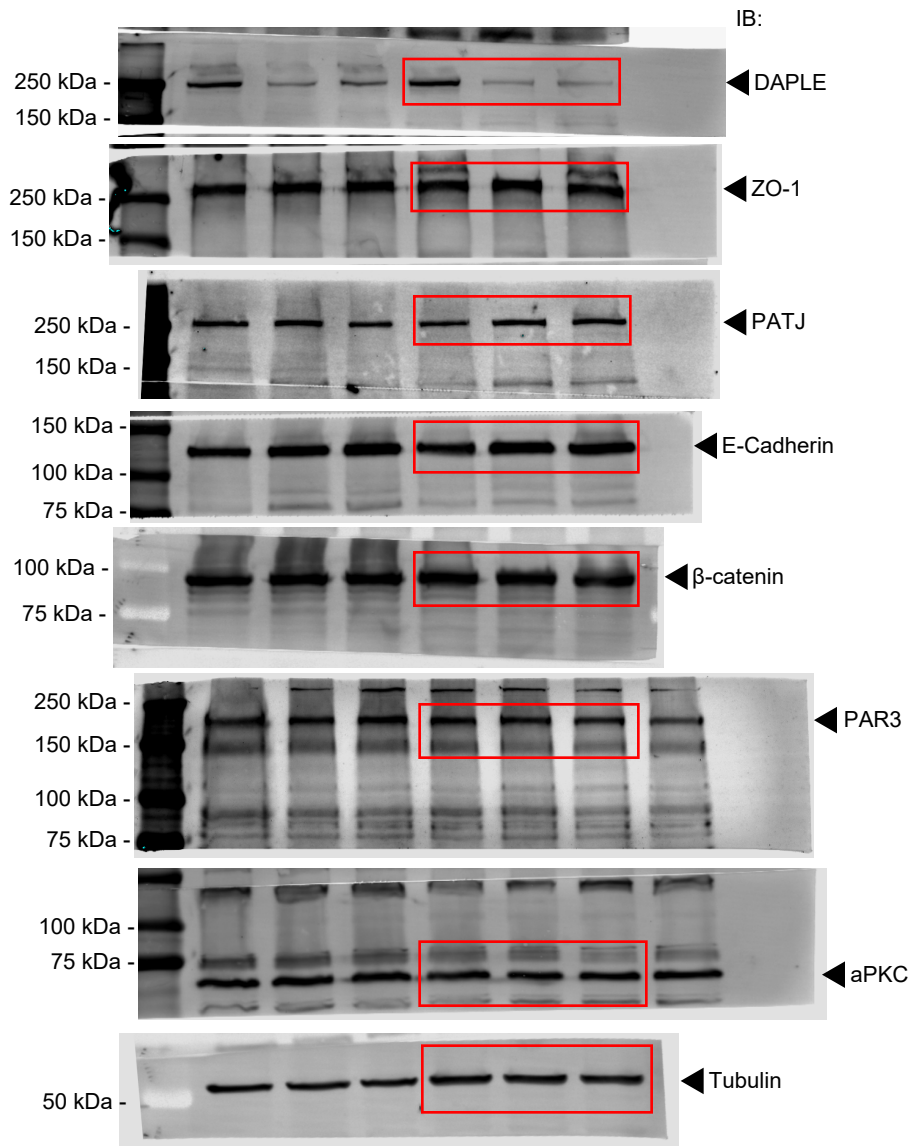

Supplement: JCB_202111002_SourceDataFS1.pdf [file JCB_202111002_SourceDataFS1.pdf]

# Source data FIGURE S4

## Figure S4 - Panel G

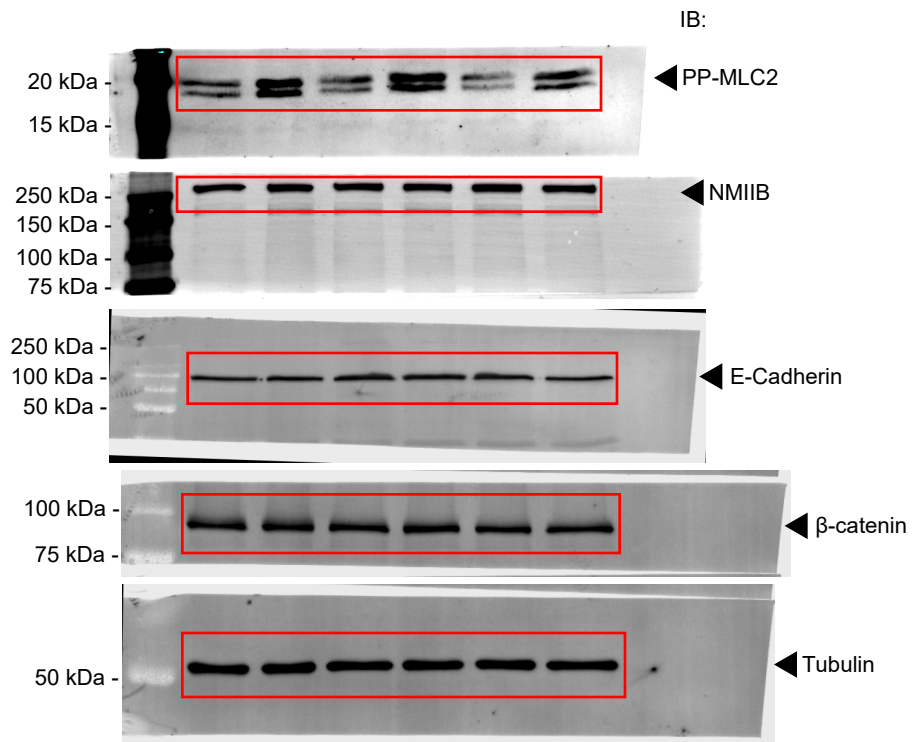

Supplement: JCB_202111002_SourceDataFS4.pdf [file JCB_202111002_SourceDataFS4.pdf]
